# Supplementary material for: A Theory of Reliance on Individuating Information and Stereotypes in Implicit Judgments of Individuals and Social Groups
Source: Hindawi journal article supplement (doi:10.1155/2022/5118325), 2022-08-27
Supplement: f1 [file 5118325.f1.docx]

Table S1: *Pilot data: Valence of traits used in Studies 1 and 2*

|  | *M*, ***SD,*** *(95% CIdifference)* | *t* | *df* | *d* |
| --- | --- | --- | --- | --- |
| Intelligent | 1.44, **.72,** (-2.74, -2.37) | -27.77 | 60 | 3.56 |
| Athletic | 2.08, **.97,** (-2.17, -1.67) | -15.43 | 60 | 1.98 |
| Unintelligent | 6.10, **1.00,** (1.84, 2.35) | 16.45 | 61 | 2.01 |

*Note.* All *p*s < .001.Valence was measured on a scale of 1 (very positive) to 7 (very negative). *t*-tests compared sample means to 4, which was the neutral midpoint of the scale.

Table S2: *Pilot data: Racial Prototypicality Evaluations of Black Names*

|  | *M,* ***SD,* (**95% CIdifference) | *t*(28) | *d* |
| --- | --- | --- | --- |
| Jamal | 6.31, **0.76**, (2.02, 2.60) | 16.35 | 3.04 |
| DeShawn | 6.45, **0.69,** (2.19, 2.71) | 19.22 | 3.55 |
| Robinson | 4.90, **1.11**, (0.47, 1.32) | 4.34 | 0.81 |

*Note.* All *p*s ≤ .001. Ratings were on a scale of 1 (Very White) to 7 (Very Black). *t*-tests compared sample means to 4, which was the neutral midpoint of the scale.

Table S3: *Pilot data: Racial Prototypicality Evaluations of White Names*

|  | *M,* ***SD,*** (95% CIdifference) | *t* | *df* | *d* |
| --- | --- | --- | --- | --- |
| Luke | 1.83, **0.93,** (-2.05, -1.30) | 9.21 | 26 | 2.33 |
| Connor | 1.79, **0.98,** (-2.26, -1.81) | 11.49 | 28 | 2.26 |
| Reed | 3.03, **1.45**, (-1.52, -0.41) | 3.58 | 28 | 0.67 |

*Note.* All *p*s ≤ .001. Ratings were on a scale of 1 (Very White) to 7 (Very Black). *t*-tests compared sample means to 4, which was the neutral midpoint of the scale.

**Study 1**

Table S4: *Trait evaluations, no information condition, Study 1*

|  | *M*, *SD, (95% CIdifference)* | *t*(42) | *d* |
| --- | --- | --- | --- |
| Jamal Intelligence | 4.56, 1.39, (0.13, 0.98) | 2.64* | 0.40 |
| Luke Intelligence | 4.77, 1.48, (0.31, 1.22) | 3.41** | 0.52 |
| Jamal athleticism | 4.70, 1.68, (0.18, 1.22) | 2.72* | 0.42 |
| Luke athleticism | 4.30, 1.58, (-0.18, 0.79) | 1.25 | 0.19 |

*Note.* Intelligence and athleticism evaluations were on scales of 1 (Very unintelligent, very unathletic) to 7 (Very intelligent, very athletic). In this condition, participants did not review information about individuals. *T*-tests compared evaluations to 4, the neutral midpoints of the response scales.

**p* < .05

***p* < .01

Table S5: *Trait evaluations, stereotype-inconsistent information condition, Study 1*

|  | *M*, *SD, (95% CIdifference)* | *t*(40) | *d* |
| --- | --- | --- | --- |
| Jamal Intelligence | 6.37, 1.48, (1.90, 2.83) | 10.24*** | 1.60 |
| Luke Intelligence | 4.00, 1.20, (-0.38, 0.38) | 0.00 | 0.00 |
| Jamal athleticism | 3.37, 1.30, (-1.04, -0.22) | -3.13** | 0.48 |
| Luke athleticism | 6.76, 0.70, (2.54, 2.98) | 25.24*** | 3.94 |

*Note.* Intelligence and athleticism evaluations were on scales of 1 (Very unintelligent, very unathletic) to 7 (Very intelligent, very athletic). The goal in this condition was to portray Jamal as intelligent and Luke as athletic; the data therefore show that our manipulation was successful. *T*-tests compared evaluations to 4, the neutral midpoints of the response scales

***p* < .01

****p* < .001

Table S6: *Trait evaluations, stereotype-consistent information condition, Study 1*

|  | *M*, *SD, (95% CIdifference)* | *t*(43) | *d* |
| --- | --- | --- | --- |
| Jamal Intelligence | 4.32, 1.18, (-0.04, 0.68) | 1.79 | 0.27 |
| Luke Intelligence | 6.20, 1.65, (1.70, 2.71) | 8.86*** | 1.58 |
| Jamal athleticism | 6.59, 1.39, (2.17, 3.01) | 12.40*** | 1.86 |
| Luke athleticism | 3.23, 1.33, (-1.18, -0.37) | -3.86*** | 0.58 |

*Note.* Intelligence and athleticism evaluations were on scales of 1 (*Very unintelligent*, *Very unathletic*) to 7 (*Very intelligent*, *Very athletic*). The goal in this condition was to portray Jamal as athletic and Luke as intelligent; the data therefore show that our manipulation was successful. *t*-tests compared evaluations to 4, the neutral midpoints of the response scales.

****p* < .001

Table S7: *Comparisons of D to 0.15 or -0.15 (as outlined in preregistration), Study 1*

| Information Condition | *M*, *SD, (95% CIdifference)* | *t* | *df* | *p* |
| --- | --- | --- | --- | --- |
| No information | 0.17, 0.36, (0.06, 0.28) | 0.43 | 42 | .67 |
| Stereotype-consistent information | 0.46, 0.37, (0.35, 0.57) | 8.24 | 43 | <.001 |
| Stereotype-inconsistent information | -0.24, 0.34, (-0.35, -0.14) | -1.77 | 40 | .09 |

*Note*. Comparisons of *D* in the no information and stereotype-consistent information condition were to 0.15. Comparisons of *D* in the stereotype-inconsistent information condition were to -0.15. Effect sizes are not provided for any single-sample t-tests performed on *D* scores in the present program of research because computation of *D* closely resembles computation of Cohen’s *d*.

Table S8: *Intervariable correlations, Study 1*

|  | Intelligence rating Jamal | Intelligence rating Luke | Athleticism rating Jamal | Athleticism rating Luke |
| --- | --- | --- | --- | --- |
| *D* score | -.30** | .37*** | .43*** | -.49*** |
| Intelligence rating Jamal |  | -.18* | -.33*** | .68*** |
| Intelligence rating Luke |  |  | .74*** | -.37*** |
| Athleticism rating Jamal |  |  |  | -.50*** |
| *Note.* *N* = 128. Ratings were made on scale of 1 (*Very unintelligent, Very unathletic*) to 7 (*Very intelligent, Very athletic*).  **p* < .05  ***p* < .01  ****p* < .001 | | | | |

**Study 1 Explicit Judgments**

Although the hypotheses tested by the present research related exclusively to implicit stereotypes, we also performed a 2 (target race: Black vs. White) X 3 (individuating information: no information vs. stereotype-consistent information vs. stereotype-inconsistent information) mixed-model ANOVA on each of the two explicit dependent measures with target race as the within-subjects factor. Explicit evaluations of the Black and White targets did not statistically significantly differ pooling across the three individuating information conditions, as indicated by the nonsignificant target race main effects for both intelligence ratings, *F*(1, 125) = 0.29, *p* = .59, *η2* =.001, and athleticism ratings, *F*(1, 125) = 0.50, *p* = .48, *η2* = .001 (see Table S9 for all Study 1 main effect means, standard deviations, and 95% confidence intervals). Individuating information influenced both dependent measures, intelligence rating *F*(2, 125) = 4.19, *p* = .02, *η2* = .03, athleticism rating *F*(2, 125) = 3.94, *p* = .02, *η2* = .01.

To follow up on the significant individuating information main effects, a series of pairwise comparisons was performed on the average trait evaluations (across Jamal and Luke) in the different individuating information conditions, and Bonferroni’s correction was applied; the resulting alphawas .017. In intelligence evaluations, means were not significantly different in the stereotype-inconsistent information condition, *M* = 5.18, *SD* = 1.34, 95% *CI* = (4.86, 5.51), compared with the no information condition, *M* = 4.66, *SD* = 1.43, 95% *CI* = (4.35, 4.98), *t*(82) = 2.28, *p* = .02, *d* = 0.38. Intelligence evaluations were higher in the stereotype-consistent information condition, *M* = 5.26, *SD* = 1.41, 95% *CI* = (4.95, 5.57), than in the no information condition, *t*(85) = 2.68, *p* = .008, *d* = .42. Intelligence evaluations in the stereotype-inconsistent information condition did not differ from those in the stereotype-consistent information condition, *t*(83) = 0.35, *p* = .73. For athleticism evaluations, evaluations in the stereotype-inconsistent information condition, *M* = 5.06, *SD* = 1.00, 95% *CI* = (4.77, 5.36), were statistically equal to those in the no information condition, *M* = 4.50, *SD* = 1.63, 95% *CI* = (4.21, 4.79), *t*(82) = 2.69, *p* = .02, *d* = .41. Athleticism evaluations in the stereotype-consistent information condition, *M* = 4.91, *SD* = 1.36 , 95% *CI* = (4.63, 5.19), did not differ from those in the no information condition, *t*(85) = 2.01, *p* = .14. Likewise, athleticism evaluations in the stereotype-consistent information condition did not differ from those made in the stereotype-inconsistent information condition, *t*(83) = 0.72, *p* = 1.00. The lack of differences in evaluations between the stereotype-consistent and stereotype-inconsistent information again was not surprising because the same information was presented in both conditions; the only difference was the target to which the information was applied.

Most relevant to the question of the effects of individuating information on explicit stereotypes were the large individuating information X target race interactions found on both measures, intelligence rating *F*(2, 125) = 54.45, *p* < .001, *η2* = .27, athleticism rating *F*(2, 125) = 124.75, *p* < .001, *η2* = .50. We performed simple effects tests to determine the specific nature of the interactions. These tests revealed that Jamal was evaluated as statistically significantly more intelligent than Luke in the stereotype-inconsistent information condition, *t*(40) = 8.04, *p* < .001, *d* = 1.76, and as less athletic than Luke in that condition, *t*(40) = -11.01, *p* < .001, *d* = 3.25 (see Table S10 for all cell means, standard deviations, and 95% confidence intervals). The reverse was true in the stereotype-consistent information condition; Jamal was evaluated as less intelligent than Luke, *t*(43) = -6.65, *p* < .001, *d =* 1.31, and as more athletic than Luke in that condition, *t*(43) = 11.3, *p* < .001, *d* = 2.48 However, participants did not explicitly judge Jamal as statistically significantly less intelligent than Luke in the no information condition, *t*(42) = -0.73, *p* = .47, *d* = 0.15. They also did not judge Luke as statistically significantly less athletic than Jamal in that condition, *t*(42) = 1.33, *p* = .19, *d* = 0.24.

| Table S9 | | | | | | | | | | | | | | | | |
| --- | --- | --- | --- | --- | --- | --- | --- | --- | --- | --- | --- | --- | --- | --- | --- | --- |
| *Means, standard deviations, and 95% confidence intervals for Study 1 explicit measure main effects* | | | | | | | | | | | | | | | | |
|  | Race of target | | | | | |  | Individuating information | | | | | | | | |
|  | Black | | | White | | |  | No Informationa | | | Stereotype Consistent Informationb | | | Stereotype Inconsistent Informationc | | |
|  | *M* | *SD* | *95% CI* | *M* | *SD* | *95% CI* |  | *M* | *SD* | *95% CI* | *M* | *SD* | *95% CI* | *M* | *SD* | *95% CI* |
| Intelligence ratinga | 5.08 | 1.62 | (4.85, 5.32) | 4.99 | 1.72 | (4.74, 5.25) |  | 4.66d | 1.43 | (4.35, 4.98) | 5.26e | 1.41 | (4.95, 5.57) | 5.18de | 1.34 | (4.86, 5.51) |
|  |  |  |  |  |  |  |  |  |  |  |  |  |  |  |  |  |
| Athleticism rating | 4.89 | 1.97 | (4.63, 5.14) | 4.76 | 1.94 | (4.54, 4.98) |  | 4.50d | 1.63 | (4.21, 4.79) | 4.91d | 1.36 | (4.63, 5.19) | 5.06d | 1.00 | (4.77, 5.36) |
| *Note.* *N* = 128. Intelligence and athleticism ratings were made on a scale of 1 (V*ery unintelligent, Very unathletic*) to 7 (*Very intelligent, Very athletic*). Race of target was a within-subjects factor, and individuating information was a between-subjects factor. Both race of target main effects were nonsignificant. For individuating information cells, cells within each dependent measure that do not share superscripts differ at *p* < .017 (alpha with Bonferroni’s correction applied).  a*n* = 43  b*n* = 44  c*n* = 41 | | | | | | | | | | | | | | | | |

| Table S10 | | | | | | | | | | | |
| --- | --- | --- | --- | --- | --- | --- | --- | --- | --- | --- | --- |
| *Study 1 full design cell means, standard deviations, and 95% confidence intervals for explicit measures* | | | | | | | | | | | |
|  |  |  | | **Individuating Information** | | |  |  | |  | |
|  | *No Informationa* | | | | *Stereotype-Consistent Informationb* | | | | *Stereotype-Inconsistent Informationc* | | | |
| **Target Race:** | *Black* | | *White* | | *Black* | *White* | | | *Black* | | *White* | |
|  | *M (SD)*  ***95% CI*** | | *M (SD)*  ***95% CI*** | | *M (SD)*  ***95% CI*** | *M (SD)*  ***95% CI*** | | | *M (SD)*  ***95% CI*** | | *M (SD)*  ***95% CI*** | |
| *Intelligence Rating* | 4.56d (1.39)  **4.15, 4.97** | | 4.77d (1.48)  **4.33, 5.21** | | 4.32e (1.18)  **3.92, 4.72** | 6.21f (1.65)  **5.77, 6.64** | | | 6.37g (1.48)  **5.95, 6.78** | | 4.00h (1.20)  **3.55, 4.45** | |
| *Athleticism Rating* | 4.70i (1.68)  **4.26, 5.14** | | 4.30i (1.58)  **3.92, 4.68** | | 6.59j (1.39)  **6.15, 7.03** | 3.23k (1.33)  **2.85, 3.61** | | | 3.37l (1.30)  **2.91, 3.82** | | 6.76m (0.70)  **6.37, 7.15** | |
| *Note.* Pairs of cell means for the Black and White targets within each individuating information condition that do not share superscripts differ at *p* < .001. Ratings were made on scales of 1 (very unintelligent, very unathletic) to 7 (very intelligent, very athletic). Target race was a within-subjects factor; individuating information was a between-subjects factor.  a*n* = 43  b*n* = 44  c*n* = 41 | | | | | | | | | | | | |

**Study 2**

Table S11: *Trait manipulation checks: Intelligence evaluations, stereotype-inconsistent information condition, Study 2*

|  | *M*, *SD, (95% CIdifference)* | *t*(54) | *d* |
| --- | --- | --- | --- |
| Jamal Intelligence | 6.47, 1.10, (2.17, 2.77) | 16.62*** | 2.25 |
| Luke Intelligence | 1.80, 1.15, (-2.51, -1.89) | -14.25*** | 1.91 |
| Jamal IQ Estimate | 117.24, 10.35 (14.44, 20.03) | 12.36*** | 1.67 |
| Luke IQ Estimate | 86.58, 10.70, (-16.31, -10.53) | -9.30*** | 1.25 |
| *Note.* Intelligence trait ratings were on scales of 1 (Very unintelligent) to 7 (Very intelligent). IQ estimates were made in the presence of guidelines describing an IQ score of 100 as “average,” 120 and above as “very high intelligence,” and 80 or below as “very low intelligence.” *T-*tests for intelligence ratings compared the mean evaluation to 4 (the neutral midpoint), and *t*-tests for IQ estimates compared the mean evaluation to 100 (the “average” point). Individuating information in this condition was intended to portray Jamal as intelligent and Luke as unintelligent, and these data show that the manipulation was successful.  ****p* < .001 | | | |

Table S13: *Intelligence evaluations, no information condition, Study 2*

|  | *M*, *SD, (95% CIdifference)* | *t*(49) | *d* |
| --- | --- | --- | --- |
| Jamal Intelligence | 4.16, 1.27, (-0.20, 0.52) | 0.89 | 0.13 |
| Luke Intelligence | 4.04, 1.26, (-0.32, 0.40) | 0.22 | 0.03 |
| Jamal IQ Estimate | 101.64, 7.00, (-0.35, 3.63) | 1.66 | 0.23 |
| Luke IQ Estimate | 100.30, 7.32, (-1.78, 2.38) | 0.29 | 0.04 |

*Note.* Intelligence trait ratings were on scales of 1 (Very unintelligent) to 7 (Very intelligent). IQ estimates were made in the presence of guidelines describing an IQ score of 100 as “average,” 120 and above as “very high intelligence,” and 80 or below as “very low intelligence.” *T-*tests for intelligence ratings compared the mean evaluation to 4 (the neutral midpoint), and *t*-tests for IQ estimates compared the mean evaluation to 100 (the “average” point). No information about individuals was provided in this condition. All *t-*tests were nonsignificant.

Table S14: *Intelligence evaluations, stereotype-consistent information condition, Study 2*

|  | *M*, *SD, (95% CIdifference)* | *t*(50) | *d* |
| --- | --- | --- | --- |
| Jamal Intelligence | 2.24, 1.18, (-2.10, -1.43) | -10.71*** | 1.50 |
| Luke Intelligence | 6.18, 1.18, (1.85, 2.51) | -13.19*** | 1.85 |
| Jamal IQ Estimate | 86.47, 12.13, (-16.94, -10.12) | -7.97*** | 1.12 |
| Luke IQ Estimate | 113.49, 12.15, (10.07, 16.91) | 7.93*** | 1.11 |

*Note.* Intelligence trait ratings were on scales of 1 (Very unintelligent) to 7 (Very intelligent). IQ estimates were made in the presence of guidelines describing an IQ score of 100 as “average,” 120 and above as “very high intelligence,” and 80 or below as “very low intelligence.” *T-*tests for intelligence ratings compared the mean evaluation to 4 (the neutral midpoint), and *t*-tests for IQ estimates compared the mean evaluation to 100 (the “average” point). This manipulation aimed to portray Jamal as unintelligent and Luke as intelligent; thus, the data show that the manipulation was successful.

****p* < .001.

Table S15: *Results from Study 2 IQ estimates including outliers: 3 (individuating information: no information vs. stereotype-consistent information vs. stereotype-inconsistent information) X 2 (target race: Black vs. White) mixed-model ANOVA, Study 2*

|  | Target race  *F*(1, 147), *η2* | Individuating information  *F*(2, 147), *η2* | Target race X Individuating information  *F*(2, 147)*, η2* |
| --- | --- | --- | --- |
| IQ estimates | 1.46, .003 | 1.62, .003 | 150.30***, .58 |

*Note.* Target race was the within-subjects factor. Target race effect was nonsignificant (reported above) when outliers were included, but significant when outliers were excluded (reported in-text).

*** *p* < .05

****p* < .001

Table S16: *Comparisons of D to 0.15 or -0.15 (as outlined in preregistration), Study 2*

| Information Condition | *M*, *SD, (95% CIdifference)* | *t* | *df* | *p* |
| --- | --- | --- | --- | --- |
| No information | 0.20, 0.34, (0.10, 0.29) | 0.99 | 49 | .33 |
| Stereotype-consistent information | 0.32, 0.37, (0.21, 0.42) | 3.26 | 50 | .002 |
| Stereotype-inconsistent information | -0.25, 0.39, (-0.35, -0.14) | -1.91 | 54 | .06 |

*Note*. Comparisons of *D* in the no information and stereotype-consistent information condition were to 0.15. Comparisons of *D* in the stereotype-inconsistent information condition were to -0.15. Effect sizes are not provided for any single-sample t-tests performed on *D* scores in the present program of research because computation of *D* closely resembles computation of Cohen’s *d*.

Table S17: *Intervariable correlations, Study 2*

|  | Intelligence rating Jamal | Intelligence rating Luke | IQ estimate Jamal | IQ estimate Luke |
| --- | --- | --- | --- | --- |
| *D* score | -.46*** | .47*** | -.43*** | .38*** |
| Intelligence rating Jamal |  | -.81*** | .78*** | -.69*** |
| Intelligence rating Luke |  |  | -.81*** | .77*** |
| IQ estimate Jamal |  |  |  | -.75*** |
| *Note.* *N* = 156. Ratings were made on scale of 1 (*Very unintelligent*) to 7 (*Very intelligent*).  ****p* < .001 | | | | |

**Study 2 Explicit Judgments**

Although the hypotheses that were tested in the present research pertained only to implicit stereotypes, as we did in Study 1, we also performed a 2 (target race: Black vs. White) X 3 (individuating information: no information vs. stereotype-consistent information vs. stereotype-inconsistent information) mixed-model ANOVA on each of the two explicit dependent measures[[1]](#footnote-1). Target race was the within-subjects factor.

The main effect of individuating information was nonsignificant for both measures, IQ estimates, *F*(2, 147) = 1.96, *p* = .15, *η2* = .004, intelligence rating, *F*(2, 153) = 0.33, *p* = .72, *η2* < .001 (see Table S18 for means, standard deviations, and 95% confidence intervals for all Study 2 main effects). We found a nonsignificant target race effect on intelligence ratings, *F*(1, 153) = 3.25, *p* = .07, *η2* = .005. In contrast, IQ estimates for Jamal, *M* = 102.58, *SD* = 14.77, *95% CI*= (101.09, 104.07), overall were slightly higher than those for Luke, *M* = 99.49, *SD* = 13.39, *95% CI* = (98.02, 100.97), *F*(1, 147) = 6.47, *p* = .01, *η2* = .01.

However, the more informative findings were the large individuating information X target race interactions found on both measures, IQ estimate *F*(2, 147) = 156.39, *p* < .001, *η2* = .58, intelligence rating *F*(2, 153) = 255.23, *p* < .001, *η2* = .69. We performed simple effects tests (see Table S19 for cell means, standard deviations, and 95% confidence intervals) to determine the specific nature of the interactions. These tests revealed that, on both explicit measures, as expected, Jamal was evaluated as more intelligent than Luke in the stereotype-inconsistent information condition, *t*IQestimate(53) = 14.93, *p* < .001, *d* = 2.93, *t*IntelligenceRating(54) = 17.64, *p* < .001, *d* = 4.15, and Luke as more intelligent than Jamal in the stereotype-consistent information condition, *t*IQestimate(45) = -10.16, *p* < .001, *d* = 2.31, *t*IntelligenceRating(50) = -14.33, *p* < .001, *d* = 3.35. However, there were no statistically significant differences between judgments of Jamal and Luke in the no information condition , *t*IQestimate(49) = 0.64, *p* = .53, *d* = 0.19, *t*IntelligenceRating(49) = 0.43, *p* = .67, *d* = 0.09.

| Table S18 | | | | | | | | | | | | | | | | |
| --- | --- | --- | --- | --- | --- | --- | --- | --- | --- | --- | --- | --- | --- | --- | --- | --- |
| *Means, standard deviations, and 95% confidence intervals for Study 2 explicit dependent measure main effects* | | | | | | | | | | | | | | | | |
|  | Race of target | | | | | |  | Individuating information | | | | | | | | |
|  | Black | | | White | | |  | No Information | | | Stereotype Consistent Information | | | Stereotype Inconsistent Information | | |
|  | *M* | *SD* | *95% CI* | *M* | *SD* | *95% CI* |  | *M* | *SD* | *95% CI* | *M* | *SD* | *95% CI* | *M* | *SD* | *95% CI* |
| IQ Estimatea | 102.58 | 14.77 | 101.09, 104.07 | 99.49 | 13.39 | 98.02, 100.97 |  | 100.97 | 7.16 | 99.47, 102.47 | 100.01 | 9.63 | 98.45, 101.57 | 102.13 | 10.29 | 100.69, 103.57 |
|  |  |  |  |  |  |  |  |  |  |  |  |  |  |  |  |  |
| Intelligence Ratingb | 4.29 | 2.11 | 4.10, 4.48 | 4.01 | 2.16 | 3.82, 4.20 |  | 4.10 | 1.26 | 3.91, 4.29 | 4.21 | 1.18 | 4.02, 4.39 | 4.14 | 1.12 | 3.96, 4.31 |
| *Note.* Intelligence ratings were made on a scale of 1 (very unintelligent) to 7 (very intelligent). All main effects except for IQ estimate race of target main effect were nonsignificant. Race of target was a within-subjects factor, and individuating information was a between-subjects factor.  a*N* = 150; *nnoinformation* = 50, *nstereotypeconsistent* = 46, *nstereotypeinconsistent* = 54  b*N* = 156; *nnoinformation* = 50, *nstereotypeconsistent* = 51, *nstereotypeinconsistent* = 55 | | | | | | | | | | | | | | | | |

| Table S19 | | | | | | | | | | | |
| --- | --- | --- | --- | --- | --- | --- | --- | --- | --- | --- | --- |
| *Study 2 full design cell means, standard deviations, and 95% confidence intervals for explicit measures* | | | | | | | | | | | |
|  |  |  | | **Individuating Information** | | |  |  | |  | |
|  | *No Informationa* | | | | *Stereotype-Consistent Informationb* | | | | *Stereotype-Inconsistent Informationc* | | | |
| **Target Race:** | *Black* | | *White* | | *Black* | *White* | | | *Black* | | *White* | |
|  | *M (SD)*  ***95% CI*** | | *M (SD)*  ***95% CI*** | | *M (SD)*  ***95% CI*** | *M (SD)*  ***95% CI*** | | | *M (SD)*  ***95% CI*** | | *M (SD)*  ***95% CI*** | |
| *IQ estimatea* | 101.64d (7.00)  **99.07, 104.21** | | 100.30d (7.32)  **97.76, 102.85** | | 88.91e (9.70)  **86.24, 91.59** | 111.11f (9.55)  **108.46, 113.76** | | | 117.19g (10.44)  **114.55, 119.92** | | 87.07h (10.15)  **84.63, 89.52** | |
| *Intelligence ratingb* | 4.16i (1.27)  **3.83, 4.49** | | 4.04i (1.26)  **3.71, 4.37** | | 2.24j (1.18)  **1.91, 2.56** | 6.18k (1.18)  **5.85, 6.51** | | | 6.47j (1.10)  **6.16, 6.79** | | 1.80k (1.15)  **1.48, 2.12** | |
| *Note.* Within each pair of means for the Black and White targets, cells that do not share a superscript differ at *p* < .001. Intelligence ratings were made on a scale of 1 (very unintelligent) to 7 (very intelligent). Target race was a within-subjects factor, and individuating information was a between-subjects factor.  a*N* = 150; *nnoinformation* = 50, *nstereotypeconsistent* = 46, *nstereotypeinconsistent* = 54  b*N* = 156; *nnoinformation* = 50, *nstereotypeconsistent* = 51, *nstereotypeinconsistent* = 55 | | | | | | | | | | | | |

**Comparing Patterns across Studies 1 and 2**

Additional hypothesis: The effects predicted in Studies 1 and 2 will be present regardless of whether the majority group stereotype is positive and the stereotype of the stigmatized minority group is negative, or whether stereotypes of both the majority and stigmatized groups are positive.

Testing this hypothesis required a comparison of the pattern of results across Studies 1 (similar valence) and 2 (different valence). Consistent with this hypothesis, in both studies, implicit stereotype-relevant judgments in the presence of counterstereotypic individuating information were opposite in direction compared with such judgments made in the absence of individuating information. However, the significant strengthening of stereotypic judgments by stereotype-consistent individuating information occurred only in Study 1; in Study 2, stereotypic judgments of individuals were descriptively, but not inferentially, stronger in the presence of stereotype-consistent individuating information than they were in its absence.

**Study 3**

Table S20

| *Racial prototypicality of Study 3 stimulus names* | | | |
| --- | --- | --- | --- |
|  | *M,* ***SD*** | *t*(28) | *d* |
| Jamal | 6.31, **0.76** | 16.35 | 3.04 |
| Terrell | 5.29, **0.96** | 9.49a | 1.34 |
| Jackson | 4.93, **1.36** | 3.68 | 0.68 |
| Eric | 2.55, **1.24** | -6.28 | -1.17 |
| Keith | 2.97, **1.68** | 3.32 | -0.61 |
| Reed | 3.03, **1.45** | -3.58 | -0.67 |
| *Note.* All *p*s ≤ .001. Ratings were on a scale of 1 (Very White) to 7 (Very Black). *T*-tests compared means to 4 (the neutral midpoint of the scale).  *a*df = 25 | | | |

Table S21: *Study 3 comparisons of D to 0.15 and -0.15 (as outlined in preregistration)*

|  | Individual targets | Group targets |
| --- | --- | --- |
| Irrelevant non-social information | *M* = 0.19, *SD* = 0.44, *t*(39) = 0.55, *p* = .583, 95% *CIdifference* = (-0.10, 0.18) | *M* = 0.14, *SD* = .52, *t*(37) = -0.10, *p* = .921, *95%­ CIdifference =* (-0.18, 0.16) |
| Stereotype-inconsistent individuating information | *M =* -0.34, *SD* = 0.28, *t*(42) = -4.53, *p* < .001, 95% *CIdifference* = (-0.28, -0.11) | *M =* 0.20, *SD* = 0.36, *t*(42) = 0.91, *p* = .367, *95% CIdifference =* (-0.06, 0.16) |

|  | IQ estimate Black target | IQ estimate White target | Intelligence rating Black target | Intelligence rating White target |
| --- | --- | --- | --- | --- |
| *D* score | -.35*** | .38*** | -.13† | .41*** |
| IQ estimate Black target |  | -.47*** | .36*** | -.45*** |
| IQ estimate White target |  |  | -.30*** | .61*** |
| Intelligence rating Black target |  |  |  | -.12 |
| *Note.* *N* = 165. Ratings were made on scale of 1 (*Very unintelligent*) to 7 (*Very intelligent*).  †*p* < .10  **p* < .05  ****p* < .001 | | | | |

*Note.* Column headers represent level of target independent variable. Row labels represent level of information independent variable. Comparisons were to 0.15 in all conditions except when perceivers judged individual targets in the presence of stereotype-inconsistent individuating information; in this condition, *D* was compared to -0.15. Effect sizes are not provided for any single-sample t-tests performed on *D* scores in the present program of research because computation of *D* closely resembles computation of Cohen’s *d*.

Table S22: *Intervariable correlations, Study 3*

**Study 3 Implicit Judgments**

*Single-Sample t-tests*

The first set of analyses established baseline stereotyping. When participants judged individual targets and had been provided with irrelevant non-social information, *D* scores were significantly greater than 0, *M* = 0.19, *SD* = 0.44, 95% *CI* = (0.05, 0.33), *t*(39) = 2.73, *p* = .009, indicating that Eric was evaluated as more intelligent than Jamal. When participants were provided with irrelevant non-social information and evaluated group targets, mean *D* scores were marginally larger than 0, *M* = 0.14, *SD* = 0.52, *95%­ CI =* (-0.03, 0.31), *t*(38) = 1.71, *p* = .095[[2]](#footnote-2), providing evidence that participants trended toward more strongly associating White people with intelligence than Black people.

When participants were provided with counterstereotypic individuating information and evaluated these same individuals, support was found for Hypothesis 1, which predicted that implicit stereotype-relevant judgments would be reversed in direction in the presence of counterstereotypic individuating information.

The pattern for the group targets condition differed from that in the individual targets condition in the presence of counterstereotypic individuating information. Specifically, when counterstereotypic exemplars were presented, *D* scores were significantly larger than 0, *M =* 0.20, *SD* = 0.36, *95% CI =* (0.09, 0.31), *t*(42) = 3.61, *p* < .001,indicating that, despite reading information about a highly intelligent Black target and an unintelligent White target, perceivers still associated White people, as a group, more with intelligence than Black people, as a group. Taken together, the pattern of results across the four *t*-tests provided some initial support for Hypothesis 3b, which predicted that counterstereotypic information would have a smaller effect when targets were racial groups compared with when targets were the individuals that were described by the counterstereotypic information. These results also provided an initial lack of support for Hypothesis 3a, which predicted similar effects of counterstereotypic information on implicit individual and group judgments.

*Main Effects from 2 X 2 ANOVA on D scores*

A significant main effect of target indicated that *D* scores were higher for group targets than for individual targets, *F*(1, 161) = 15.49, *p* < .001, *η2* = .07 (see Table S23 for means, standard deviations, and 95% confidence intervals for both main effects in this analysis). A significant main effect for information showed that IAT scores were higher when irrelevant non-social information was provided than when counterstereotypic information was provided, *F*(1, 161) = 13.97, *p* < .001, *η2* = .07.

**Explicit Judgments**

The hypotheses tested in Study 3 exclusively pertained to the implicit measure. However, we subjected data from intelligence ratings and IQ estimates to 2 (target: individuals vs. racial groups) X 2 (information: irrelevant non-social information vs. counterstereotypic individuating information) X 2 (target race: Black vs. White) mixed-model ANOVAs in which target race was the within-subjects factor. Only focal results are reported below; complete test statistics, significance levels, and effect sizes can be found in Supplemental Materials.

The most relevant findings were the significant target X target race X information interactions that were found on both dependent measures, *F*IQ(1, 160) = 47.54, *p* < .001, *η2* = .10, *F*intelligence (1, 161) = 23.29, *p* < .001, *η2* = .05. To explicate these interactions, two separate 2 (target race) X 2 (information) ANOVAs were performed for each measure: one only on data from the individual targets condition, and one only on data from the group targets condition. For both measures, the target race X information interaction was significant when the targets were individuals, *F*IQ(1, 81) = 52.42, *p* < .001, *η2* = .22, *F*intelligence(1, 81) = 32.65, *p* < .001, *η2* = .18, but not when the targets were the racial groups, *F*IQ(1, 79) = 0.16, *p* = .687, *η2* < .001, *F*intelligence(1, 80) = 2.17, *p* = .145, *η2* < .001.

The patterns of means for the significant target race X information interactions (i.e., those for perceivers who judged individual targets) showed that there were no statistically significant differences between judgments of the Black and the White target in the presence of irrelevant, non-social information, but that the Black target was judged as more intelligent than the White target when the information was stereotype-inconsistent. For group targets, differences between targets of different races were not statistically significant in the presence of either type of information (see below for all descriptive statistics and pairwise comparisons).

Thus, consistent with Studies 1 and 2, there was insufficient evidence to conclude that stereotypes influenced explicit judgments in the absence of diagnostic individuating information, regardless of whether the target was an individual or a group. And, as was the case with results from the Study 3 IAT, when diagnostic individuating information was available, perceivers relied on this information in their explicit evaluations of these same individuals, but not in their evaluations of the racial groups.

**Pairwise comparisons for interactions for 2 (target race) X 2 (individuating information) X ANOVAs on explicit dependent measures**

To explicate the significant three-way interactions found in Study 3 (target race X individuating information X target), two separate 2 X 2 ANOVAs were performed for each of the two explicit dependent measures (IQ estimates and intelligence ratings); one on each level of target (individual targets or group targets). When targets were groups, the interactions were nonsignificant, *F*IQ(1, 79) = 0.16, *p* = .687, *η2* < .001, *F*intelligence (1, 80) = 2.17, *p* =.145, *η2* = .004. When targets were individuals, both interactions were significant, *FIQ*(1, 81) = 52.42, *p* < .001, *η2* = .22, *Fintelligence*(1, 81) = 32.65, *p* < .001, *η2* = .18.

For IQ estimates, the interactions indicated that in the presence of irrelevant non-social information, when the targets were individuals, there were no differences between evaluations of the Black and the White target, *M*Black = 101.37, *SD*Black = 9.61*, 95% CIBlack* = (97.85, 104.90), *M*White = 100.17, *SD*White = 9.33, *95% CIWhite* = (96.99, 103.36), *t*(38) = 0.50, *p* = .616, *r* = .04, and the same was true when targets were groups, *M*Black = 100.84, *SD*Black = 6.49, *95% CIBlack* = (98.89, 102.79), *M*White = 101.76, *SD*White = 5.33, *95% CIWhite* = (100.00, 103.53), *t*(36) = -0.70, *p* = .488, *r* = .06. In the presence of counterstereotypic individuating information, when the targets were groups, Black and White people were judged to have equal IQs, *M*Black = 101.00, *SD*Black = 5.62, *95% CIBlack* = (99.17, 102.83), *M*White = 102.47, *SD*White = 5.60, *95% CIWhite* = (100.80, 104.13), *t*(41) = -1.18, *p* = .24, *r* = 0.10, but when targets were individuals, Jamal was evaluated as having a far higher IQ than Eric, *M*Black = 116.65, *SD*Black = 12.50, *95% CIBlack* = (113.25, 120.05), *M*White = 87.72, *SD*White = 10.81, *95% CIWhite* = (84.65, 90.79), *t*(41) = 12.56, *p* < .001, *r* = 0.72.

A similar pattern emerged for intelligence ratings. As with the IQ estimates, there were no differences between evaluations of the Black and the White target in the presence of irrelevant non-social information, regardless of whether the target was an individual, *M*Black = 4.43, *SD*Black = 1.08, *95% CIBlack =* (3.96, 4.89), *M*White = 4.15, *SD*White = 1.27, *95% CIWhite =* (3.68, 4.62), *t*(44) = 0.89, *p* = .376, *r* = .08, or a group, *M*Black = 5.05, *SD*Black = 1.50, *95% CIBlack =* (4.62, 5.48), *M*White = 5.42, *SD*White = 1.42, *95% CIWhite =* (5.01, 5.83), *t*(37) = 0.58, *p* = .562, *r* = .06. However, in the presence of counterstereotypic individuating information, although there were no differences between the two target races in evaluations of the group targets, *M*Black = 5.42, *SD*Black = 1.18, *95% CIBlack =* (5.01, 5.83), *M*White = 5.28, *SD*White = 1.35, *95% CIWhite =* (4.86, 5.70) *t*(41) = 0.48, *p* = .635, *r* = .05, the individual Black target was evaluated as far more intelligent than the individual White target, *M*Black = 6.00, *SD*Black = 1.77, *95% CIBlack =* (5.55, 6.45), *M*White = 2.37, *SD*White = 1.66, *95% CIWhite =* (1.92, 2.82), *t*(41) = 11.33, *p* < .001, *r* = .72.

| Table S23 | | | | | | | | | | | | |
| --- | --- | --- | --- | --- | --- | --- | --- | --- | --- | --- | --- | --- |
| *Study 3 D score main effect means, standard deviations, and 95% confidence intervals* | | | | | | | | | | | | |
|  | Target | | | | | | Information | | | | | |
|  | Individualsa | | | Groupsb | | | Irrelevant informationc | | | Stereotype-inconsistent informationd | | |
|  | *M* | *SD* | *95% CI* | *M* | *SD* | *95% CI* | *M* | *SD* | *95% CI* | *M* | *SD* | *95% CI* |
| *D* scores | -0.08 | 0.45 | (-0.16, -0.01) | 0.17 | 0.44 | (0.08, 0.26) | 0.17 | 0.48 | (0.08, 0.26) | -0.07 | 0.42 | (-0.16, 0.02) |
| *Note. N* = 165. Target and information were both between-subjects factors. Both main effects were significant at *p* < .001.  a*n* = 83.  b*n* = 82.  c*n* = 79.  d*n* = 86. | | | | | | | | | | | | |

Table S24

*Study 3 2 (target race: Black vs. White) X 2 (individuating information: irrelevant information vs. counterstereotypic individuating information) X 2 (target: individuals vs. groups) ANOVA results, explicit dependent measures*

|  | Target race  *F*, *η2* | Target  *F*, *η2* | Individuating information  *F, η2* | Target race X target  *F*, *η2* | Target race X individuating information  *F*, *η2* | Target X individuating information  *F, η2* | Target race X target X individuating information  *F*, *η2* |
| --- | --- | --- | --- | --- | --- | --- | --- |
| IQ estimates | 45.78***, .10 | 0.002,  < .001 | 1.11, .002 | 62.88***, .13 | 43.95***, .09 | 0.32, < .001 | 47.54***, .10 |
| Intelligence ratings | 37.76***, .08 | 41.16***, .08 | 0.12, < .001 | 39.34***, .08 | 34.12***, .07 | 0.97, .002 | 23.29***, .05 |

*Note.* Target race was a within-subjects factor. All other independent variables were between-subjects. Effect sizes are reported only for significant effects. Degrees of freedom for IQ estimates were (1, 186); for intelligence ratings degrees of freedom were (1, 187). *N* = 191.

*** *p* < .001

**Study 4**

Table S25: *Pilot data for first names used in Study 4 and for IAT stimulus names in Study 3*

|  | *M* | *SD* | 95% *CIdifference* | *t*(24)*, d* |
| --- | --- | --- | --- | --- |
| Jamal | 2.08 | 0.70 | (-2.21, -1.63) | -13.67***, -2.74 |
| DeShawn | 2.20 | 1.16 | (-2.28, -1.32) | -7.79***, -1.55 |
| DeAndre | 2.32 | 1.11 | (-2.14, -1.22) | -7.58***, -1.51 |
| Terrell | 2.64 | 1.04 | (-1.79, -0.93) | -6.56***, -1.31 |
| Tyrone^ | 2.16 | 1.07 | (-2.28, -1.40) | -8.62***, -1.72 |
| Darnell^ | 2.60 | 1.16 | (-1.88, -0.92) | -6.06***, -1.21 |
| Luke | 5.84 | 0.85 | (1.49, 2.19) | 10.82***, 2.16 |
| Brett | 5.84 | 1.03 | (1.42, 2.26) | 8.95***, 1.79 |
| Bradley | 5.76 | 1.09 | (1.31, 2.21) | 8.07***, 1.61 |
| Connor | 5.88 | 0.97 | (1.48, 2.28) | 9.68***, 1.94 |
| Bruce^ | 5.34 | 1.11 | (-1.77, -0.92) | 6.52***, 1.21 |
| Dylan^ | 5.76 | 0.97 | (1.36, 2.16) | 9.08***, 1.81 |

*Note*. Participants were asked, “If you had to guess whether someone named [target name] is Black or White, what would you guess?” Response scale was from 1 (Definitely Black) to 7 (Definitely White). *t-*tests compared means to 4 (Not Sure).

**^**Name was used exclusively as an IAT stimulus in Studies 3 and 4; all other names were used in target descriptions in Study 4.

****p* < .001.

Table S26: *Evaluations of Study 4 stimulus targets’ intelligence*

|  | *N* | *M* | *SD* | 95% *CIdifference* | *t, d* |
| --- | --- | --- | --- | --- | --- |
| Jamal Williams | 86 | 6.31 | 1.18 | (2.06, 2.57) | 18.17***, 1.96 |
| DeShawn Washington | 86 | 6.21 | 1.17 | (1.96, 2.46) | 17.52***, 1.89 |
| DeAndre Carter | 30 | 6.23 | 1.25 | (1.77, 2.70) | 9.78***, 1.79 |
| Terrell Jefferson | 30 | 6.53 | 1.53 | (1.96, 3.10) | 9.10***, 1.66 |
| Luke Brooks | 86 | 4.36 | 0.77 | (0.20, 0.52) | 4.37***, 0.47 |
| Brett Wilson | 86 | 4.50 | 0.93 | (0.30, 0.70) | 4.99***, 0.54 |
| Bradley Patterson | 30 | 4.23 | 0.57 | (0.02, 0.45) | 2.25*, 0.41 |
| Connor Johnson | 30 | 4.53 | 0.94 | (0.18, 0.88) | 3.12**, 0.57 |

*Note.* Sample sizes vary because targets with larger sample sizes were evaluated by participants in both the two pairs of exemplars and four pairs of exemplars conditions, whereas targets with smaller sample sizes were only evaluated by participants in the four pairs of exemplars condition. Means reflect ratings of each target on a scale of 1 (Very unintelligent) to 7 (Very intelligent). *T-*tests compared mean evaluations to 4 (the neutral midpoint of the scale); if evaluations of Black targets were statistically greater than 4 (as all were), this indicated that the study’s manipulation was successful.

**p* < .05.

***p* < .01.

****p* < .001.

Table S27: *Evaluations of Study 4 stimulus targets’ athleticism*

|  | *N* | *M* | *SD* | 95% *CIdifference* | *t, d* |
| --- | --- | --- | --- | --- | --- |
| Jamal Williams | 86 | 3.83 | 0.95 | (-0.38, 0.03) | -1.71, 0.18 |
| DeShawn Washington | 86 | 3.86 | 1.13 | (-0.38, 0.10) | -1.15, 0.12 |
| DeAndre Carter | 30 | 3.83 | 0.99 | (-0.53, 0.20) | -0.93, 0.17 |
| Terrell Jefferson | 30 | 3.77 | 0.82 | (-0.54, 0.07) | -1.56, 0.29 |
| Luke Brooks | 86 | 6.50 | 1.32 | (2.22, 2.78) | 17.60***, 1.90 |
| Brett Wilson | 86 | 6.49 | 1.36 | (2.22, 2.78) | 16.95***, 1.83 |
| Bradley Patterson | 30 | 6.77 | 0.43 | (2.61, 2.93) | 35.23***, 6.43 |
| Connor Johnson | 30 | 6.73 | 0.94 | (2.38, 3.09) | 15.85***, 2.89 |

*Note.* Sample sizes vary because targets with larger sample sizes were evaluated by participants in both the two pairs of exemplars and four pairs of exemplars conditions, whereas targets with smaller sample sizes were only evaluated by participants in the four pairs of exemplars condition. Means reflect ratings of each target on a scale of 1 (Very unathletic) to 7 (Very athletic). *T-*tests compared mean evaluations to 4 (the neutral midpoint of the scale); if evaluations of White targets were statistically greater than 4 (as all were), this indicated that the study’s manipulation was successful.

****p* < .001.

Table S28: *Comparisons of D to 0.15 (as outlined in preregistration), Study 4*

| Information Condition | *M*, *SD, (95% CIdifference)* | *t* | *df* | *p* |
| --- | --- | --- | --- | --- |
| Irrelevant nonsocial information | 0.27, 0.37, (0.03, 0.20) | 2.82 | 78 | .006 |
| Two pairs of exemplars | 0.23, 0.38, (-0.02, 0.19) | 1.61 | 55 | .113 |
| Four pairs of exemplars | 0.17, 0.31, (-0.10, 0.13) | 0.32 | 29 | .751 |

*Note*. Effect sizes are not provided for any single-sample t-tests performed on *D* scores in the present program of research because computation of *D* closely resembles computation of Cohen’s *d*.

Table S29: *Study 4 intervariable correlations*

|  | IQ estimate Black target | IQ estimate White target | Intelligence rating Black target | Intelligence rating White target | Athleticism rating Black target | Athleticism rating White target |
| --- | --- | --- | --- | --- | --- | --- |
| *D* score | -.10 | -.01 | .00 | .08 | -.01 | .06 |
| IQ estimate Black target |  | .53*** | .27*** | .06 | -.02 | .00 |
| IQ estimate White target |  |  | .02 | .25** | .21** | .20** |
| Intelligence rating Black target |  |  |  | .75*** | .41*** | .49*** |
| Intelligence rating White target |  |  |  |  | .51*** | .52*** |
| Athleticism rating Black target |  |  |  |  |  | .63*** |
| *Note.* *N* = 165. Ratings were made on scales of 1 (*Very unintelligent, Very unathletic*) to 7 (*Very intelligent, Very athletic*).  ***p* < .01  ****p* < .001 | | | | | | |
|  | | | | |  |  |

**Study 4 Implicit Stereotypes: Preliminary Analyses**

Mean *D* scores were significantly greater than 0 in all of the information conditions, indicating the presence of implicit stereotype bias, *M*irrelevant = 0.27, *SD*­irrelevant = 0.37, 95% *CI* = (0.18, 0.35), *t*(78) = 6.46, *p* < .001, *M*2pairs = 0.23, *SD*2pairs = 0.38, 95% *CI* = (0.13, 0.34), *t*(55) = 4.54, *p* < .001, *M*­4pairs = 0.17, *SD*4pairs = 0.31, 95% *CI* = (0.05, 0.28), *t*(29) = 2.98, *p* = .006.

**Explicit Stereotypes**

Although the hypotheses tested in Study 4 did not pertain to explicit stereotypes, we analyzed the data from the explicit measures to examine patterns of stereotype bias on explicit measures. We subjected IQ estimates, intelligence ratings, and athleticism ratings to 3 (information: irrelevant non-social information vs. 2 pairs of exemplars vs. 4 pairs of exemplars) X 2 (target race: Black vs. White) mixed model ANOVAs. Target race was the within-subjects factor.

In IQ estimates, both main effects and the interaction were non-significant, *F*TargetRace(1, 161) = 1.49, *p* = .223, *η2* = .003, *F*information(1, 161) = 1.04, *p* = .36, *η2* = .01, *F*interaction= 0.22, *p* = .81, *η2* = .001. These results indicated that there were no significant differences between judgments of Black and White targets’ IQs, and that this did not change on the basis of the number of exemplars to which participants were exposed.

The analysis of intelligence ratings revealed a significant but diminutive effect of target race, *F*TargetRace(1, 162) = 5.14, *p* = .025, *η2* = .004, such that across the three individuating information conditions, Black people, *M* = 5.06, *SD=* 1.17, 95% *CI* = (4.88, 5.27), were evaluated as slightly more intelligent that White people, *M*= 4.93, *SD* = 1.19, 95% *CI* = (4.72, 5.11). The main effect of information was nonsignificant, *F*(2, 162) = 0.17, *p* = .847, *η2* = .002, as was the interaction, *F*= 0.79, *p* = .455, *η2* = .002. This indicated that the slight difference between evaluations of Black and White people’s intelligence did not significantly change regardless of the number of exemplars that were provided.

Finally, athleticism ratings showed a significant main effect of target race, *F*(1, 162) = 44.52, *p* < .001, *η2* = .05, indicating that Black people, *M* = 5.67, *SD* = 1.26, 95% *CI* = (5.47, 5.88) were judged as moderately more athletic than White people, *M* = 5.11, *SD* = 1.04, 95% *CI* = (4.93, 5.28). This did not statistically significantly vary based on information condition as indicated by a nonsignificant target race X information interaction, *F*(2, 162) = 0.42, *p* = .660, *η2* = .001. In addition, the nonsignificant main effect of information, *F*(1, 162) = 0.78, *p* = .459, *η2* = .008, revealed that, across levels of target race, there were no statistically significant differences between athleticism ratings in the various information conditions.

In sum, across these analyses, there was slight evidence that Black people were evaluated as more intelligent than White people, and there was moderate evidence for the explicit stereotype that Black people are more athletic than White people. These patterns held true regardless of the number of exemplars to which participants were exposed.

**Supplemental Methods Information**

**IAT categories and stimuli, Study 1**

*Jamal*: Jamal, DeShawn, Robinson

*Luke*: Luke, Connor, Reed

*Intelligent*: Intelligent, Smart, Competent

*Athletic*: Athletic, coordinated, muscular

**Explicit dependent measures, Study 1:**

How unintelligent or intelligent is [Jamal/Luke]?

1 = Very unintelligent, 2 = Moderately unintelligent, 3 = Slightly unintelligent, 4 = Neither unintelligent nor intelligent, 5 = Slightly intelligent, 6 = Moderately intelligent, 7 = Very intelligent

How unathletic or athletic is [Jamal/Luke]?

1 = Very unathletic, 2 = Moderately unathletic, 3 = Slightly unathletic, 4 = Neither unathletic nor athletic, 5 = Slightly athletic, 6 = Moderately athletic, 7 = Very athletic

**IAT categories and stimuli, Study 2**

*Jamal*: Jamal, DeShawn, Robinson

*Luke*: Luke, Connor, Reed

*Intelligent*: Intelligent, Smart, Competent

*Stupid*: Stupid, dumb, unintelligent

**Explicit dependent measures, Study 2:**

How unintelligent or intelligent is [Jamal/Luke]?

1 = Very unintelligent, 2 = Moderately unintelligent, 3 = Slightly unintelligent, 4 = Neither unintelligent nor intelligent, 5 = Slightly intelligent, 6 = Moderately intelligent, 7 = Very intelligent

What is your estimate of [Jamal/Luke]’s IQ? An IQ of 100 is average, an IQ of 120 and above is considered very high intelligence, and an IQ below 80 is considered very low intelligence.

**IAT categories and stimuli, Study 3: Individual targets conditions**

*Jamal:* Jamal, Terrell, Jackson

*Eric:* Eric, Keith, Reed

*Intelligent:* Intelligent, competent, smart

*Stupid:* Stupid, dumb, unintelligent

**IAT categories and stimuli, Study 3: Group targets conditions***

*Black people*: Darnell, Tyrone

*White people:* Dylan, Bruce

*Intelligent:* Intelligent, competent

*Stupid:* Stupid, unintelligent

*IAT stimulus words differed from those in the individual targets conditions because participants who were in the counterstereotypic individuating information conditions reviewed individuating information about Jamal Terrell Jackson and Eric Keith Reed regardless of whether the targets were individuals or groups. To ensure we measured perceptions of the groups instead of person perception, it was necessary for the stimulus words to differ from those in the individual targets condition.

**Explicit dependent measures, Study 3**

What is your general estimate of [Black people's/White people’s/Jamal’s/Eric’s] IQ[s]?  An IQ of 100 is average, an IQ of 120 and above is considered very high intelligence, and an IQ below 80 is considered very low intelligence.

How unintelligent or intelligent [are/is] [Black people/White people/Jamal/Eric]?

1 = Very unintelligent, 2 = Moderately unintelligent, 3 = Slightly unintelligent, 4 = Neither unintelligent nor intelligent, 5 = Slightly intelligent, 6 = Moderately intelligent, 7 = Very intelligent

**Target descriptions, Study 4**

Luke Brooks is training for a marathon. He runs anywhere from 5 to 20 miles most days and also goes to the gym to build his strength. Last time he ran a marathon, he came in third place.*

Brett Wilson is on his Division I college's soccer team. He has 20 hours of practice with his teammates each week in which they do drills and play competitive practice games. He also plays basketball recreationally to cross-train.*

Bradley Patterson is training for a bike marathon (104 miles). He rides his bike anywhere from 15 to 80 miles most days to prepare and also runs. Last time he did a bike marathon, he came in second place.**

Conner Johnson is a serious rock climber. He frequently travels to climb some of the highest, most dangerous mountains in the U.S. To condition himself, he runs, goes to the gym, and swims.**

DeShawn Washington recently came in first place at a national Scrabble tournament. He also enjoys learning about philosophy and reads the works of famous philosophers such as Plato and Aristotle.*

Jamal Williams has a passion for chemistry and was a teaching assistant for an organic chemistry class as an undergraduate. He also likes to play chess and solves crossword puzzles.*

DeAndre Carter loves physics and spends a lot of time reading physics magazines and journals. He also enjoys solving Rubik's cubes and sudoku puzzles.**

Terrell Jefferson got a combined score (math + verbal) of 1580 on his SATs in high school, which was better than 99% of all other high school students. He eventually graduated from Princeton University's Physics Ph.D. program.**

*Description was used only when two pairs of exemplars were provided.

**Description was used when two pairs and four pairs of exemplars were provided.

**IAT categories and stimuli, Study 4**

*Black people:* Tyrone, Darnell

*White people*: Bruce, Dylan

*Intelligent:* Smart, competent

*Athletic*: Muscular, fit

**Explicit dependent measures, Study 4**

What is your estimate of [Black/White] people's IQs, in general?  An IQ of 100 is average, an IQ of 120 and above is considered very high intelligence, and an IQ below 80 is considered very low intelligence.

How unintelligent or intelligent are [Black/White] people, in general?

1 = Very unintelligent, 2 = Moderately unintelligent, 3 = Slightly unintelligent, 4 = Neither unintelligent nor intelligent, 5 = Slightly intelligent, 6 = Moderately intelligent, 7 = Very intelligent

How unathletic or athletic are [Black/White] people, in general?

1 = Very unathletic, 2 = Moderately unathletic, 3 = Slightly unathletic, 4 = Neither unathletic nor athletic, 5 = Slightly athletic, 6 = Moderately athletic, 7 = Very athletic

1. Six outliers (scores falling more than 2.5 standard deviations from the mean) on the IQ estimate measure slightly changed the results of the IQ estimate ANOVA, so they were excluded only from that analysis. See below for ANOVA results including these outliers. [↑](#footnote-ref-1)
2. This *t­*-test was statistically significant prior to the random data deletions, *t*(45) = 2.07, *p* = .04. [↑](#footnote-ref-2)
